# Supplementary material
Source: PubMed Central journal article supplement (PMC2493362)
Supplement: supp_28_15_4782__1.pdf [file supp_28_15_4782__1.pdf]

### Supplementary Figure 1.

(A) WT (K699), YFL234 (*dot1Δ*), YFL499/3d (*dot1Δchk1Δ*) and YFL438 (*dot1Δmec1-1*) cells were held arrested in M phase with nocodazole and either mock or UV irradiated (75 J/m<sup>2</sup>). Analysis of Rad53 phosphorylation, 30 minutes after UV irradiation, was performed by monitoring the mobility shift in SDS-PAGE. (B) WT, *dot1Δ*, *set1Δset2Δ* and *dot1Δset1Δset2Δ* cells were held arrested in M phase with nocodazole and either mock or UV irradiated. Analysis of Rad53 phosphorylation, 30 minutes after UV irradiation, was performed by monitoring the mobility shift in SDS-PAGE. (C) WT, *hhf2-K20R*, *hhf2-K59R*, *dot1Δ*, *hhf2-K20Rdot1Δ*, *hhf2-K59Rdot1Δ* cells were arrested in nocodazole in M-phase and either mock or UV irradiated. Analysis of checkpoint activation, 30 minutes after UV irradiation, was performed by monitoring the mobility shift of Rad53 in SDS-PAGE. (D) YMAG149/7b (WT), YMAG168 (H2A-S129A), YMAG150/4A (*dot1Δ*) and YMAG170 (*dot1ΔH2A-S129A*) were arrested with nocodazole and either mock or UV irradiated (75 J/m<sup>2</sup>); 30 minutes after irradiation, Rad53 and Rad9 proteins were analyzed by SDS PAGE and western blotting.
