# Supplementary material
Source: PubMed Central journal article supplement (PMC2493362)

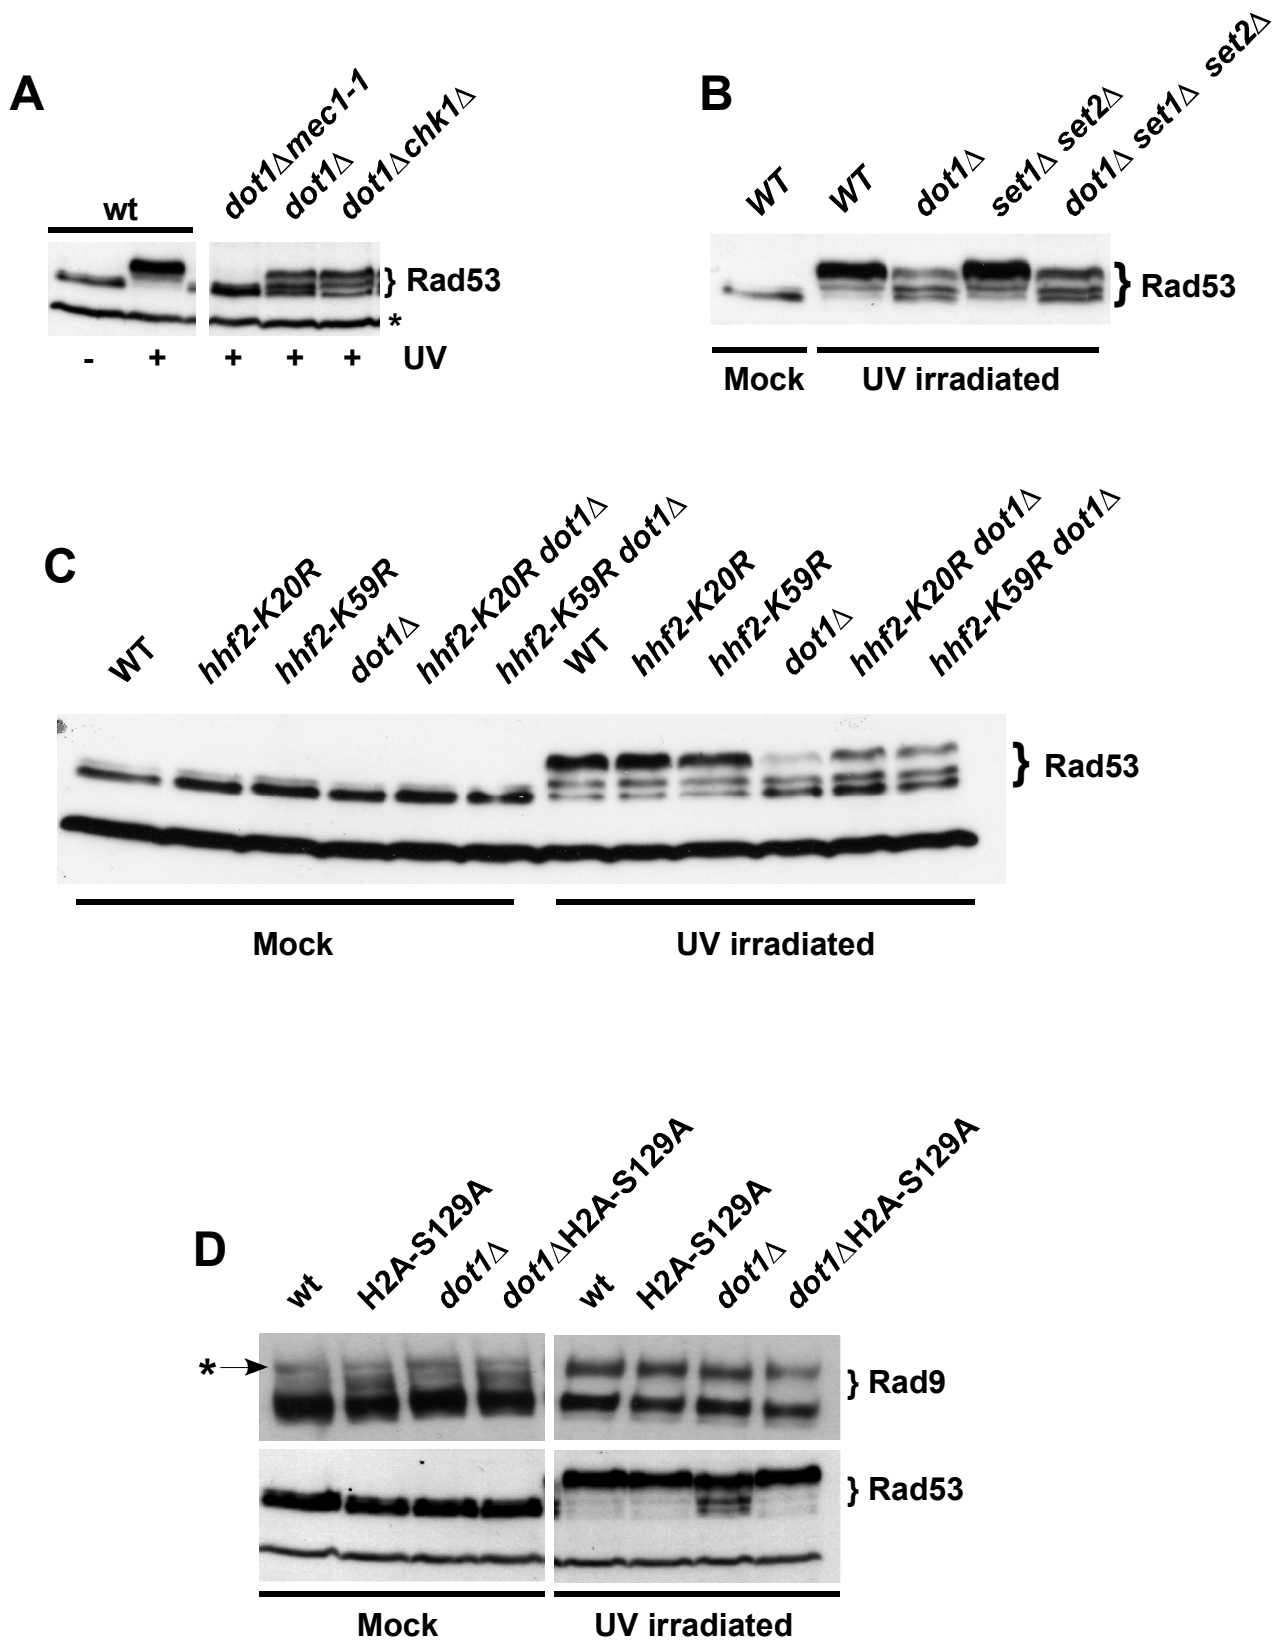

Supplement: supp_28_15_4782__2.pdf [file supp_28_15_4782__2.pdf]
